# Supplementary material for: Diabetes Does Not Increase the Risk of Hospitalization Due to COVID-19 in Patients Aged 50 Years or Older in Primary Care—APHOSDIAB—COVID-19 Multicenter Study
Source: MDPI journal article supplement (doi:10.3390/jcm11082092), 2022-04-08
Supplement: s1 [file s1]

## INVESTIGATORS

| Researcher                        | Center                                                 | City                              |
|-----------------------------------|--------------------------------------------------------|-----------------------------------|
| IMACULADA CANDELA GARCÍA          | HEALTH CENTER SANTA POLA                               | SANTA POLA (ALICANTE)             |
| FRANCISCO JAVIER ORTEGA RÍOS      | HEALTH CENTER CAMPOS LAMPREANA                         | VILLARRÍN DE CAMPOS (ZAMORA)      |
| JUAN FRANCISCO MERINO TORRES      | HOSPITAL LA FE                                         | VALENCIA                          |
| JOSEP MARIA VILASECA LLOBET       | CAP COMTE BORRELL                                      | BARCELONA                         |
| ROCÍO ORBEA GARCÍA                | HEALTH CENTER CAMPOS LAMPREANA                         | VILLARRÍN DE CAMPOS (ZAMORA)      |
| JAVIER DIEZ ESPINO                | HEALTH CENTER SALUD TAFALLA                            | TAFALLA (NAVARRA)                 |
| JUAN MANUEL ZAZO MENARGUES        | HEALTH CENTER EL RAVAL -ELX                            | ELCHE (ALICANTE)                  |
| ANDREA BERNABÉ CASANOVA           | HEALTH CENTER EL RAVAL                                 | ELCHE (ALICANTE)                  |
| JOSE LUIS PARDO FRANCO            | HEALTH CENTER ORIHUELA I                               | ORIHUELA (ALICANTE)               |
| JUAN MANUEL CALDERON GUADALUPE    | HEALTH CENTER VILLARRIN DE CAMPOS                      | VILLARRIN DE CAMPO (ZAMORA)       |
| LUIS AVILA LACHICA                | HEALTH CENTER AXARQUIA OESTE                           | ALMACHAR                          |
| SANDRA ZARZA MARTÍNEZ             | HEALTH CENTER LA PUEBLA DE ALMORADIEL                  | LA PUEBLA DE ALMORADIEL (TOLEDO)  |
| SILVIA ZAMORA MESTRE              | HEALTH CENTER ROGER DE FLOR                            | BARCELONA                         |
| MARIA BELEN BENITO BADORREY       | HEALTH CENTER RAVAL SUD                                | BARCELONA                         |
| ENRIQUE CARRETERO ANIBARRO        | HEALTH CENTER HERRERA                                  | HERRERA (SEVILLA)                 |
| PILAR-COSIALES                    | HEALTH CENTER AZPILAGAÑA                               | PAMPLONA                          |
| SALVADOR PERTUSA MARTINEZ         | HEALTH CENTER CABO HUERTAS                             | ALICANTE                          |
| IGNACIO PÁRRAGA                   | HEALTH CENTER ZONA VIII                                | ALBACETE                          |
| MANEL MATA CASES                  | HEALTH CENTER LA MINA                                  | SANT ADRIÀ DE BESÒS (BARCELONA)   |
| JOSE LUIS TORRES BAILE            | HEALTH CENTER RODRIGUEZ PATERNA                        | LOGROÑO                           |
| ROSARIO IGLESIAS GONZÁLEZ         | HEALTH CENTER PEDRO LAÍN ENTRALGO                      | ALCORCÓN (MADRID)                 |
| MARTA ROSET BARTROLI              | HEALTH CENTER CONGRÉS                                  | BARCELONA                         |
| BÁRBARA CÁNOVAS GAILLEMIN         | TOLEDO HOSPITAL COMPLEX                                | TOLEDO                            |
| ANDER BURGAÑA AGOÛES              | HEALTH CENTER SANT CUGAT                               | SANT CUGAT DEL VALLÈS (BARCELONA) |
| LAURA MOLA REYES                  | HOSPITAL CENTRAL DE LA DEFENSA GÓMEZ ULLA              | MADRID                            |
| ISABEL SANTSALVADOR FONT          | HEALTH CENTER VALLDOREIX                               | SANT CUGAT DEL VALLÈS (BARCELONA) |
| CRISTIAN MARCO ALACID             | HOSPITAL VIRGEN DE LOS LIRIOS                          | ALCOY (ALICANTE)                  |
| CRISTINA TERCERO MACIÁ            | ELCHE GENERAL HOSPITAL<br>HEALTH CENTER SALUD EL RAVAL | ELCHE (ALICANTE)                  |
| GUAYENTE VERDES SANZ              | ALCAÑIZ COUNTY HOSPITAL                                | ALCAÑIZ (TERUEL)                  |
| MARIA MERINO VIVEROS              | GETAFE UNIVERSITY HOSPITAL                             | GETAFE (MADRID)                   |
| MARIA GUADALUPE GUIJARRO DE ARMAS | GETAFE UNIVERSITY HOSPITAL                             | GETAFE (MADRID)                   |
| CRISTINA NAVEA AGUILERA           | GETAFE UNIVERSITY HOSPITAL                             | GETAFE (MADRID)                   |
| M ANGELES SALVADOR MILIAN         | HEALTH CENTER CONGRES                                  | BARCELONA                         |

|                                          |                                          |                                     |
|------------------------------------------|------------------------------------------|-------------------------------------|
| ELENA CARIDE MIANA                       | HEALTH CENTER LOS ÁNGELES                | ALICANTE                            |
| ALBA MARTIN GONZALEZ                     | HOSPITAL 12 <sup>th</sup> OCTOBER        | MADRID                              |
| ROSA M MIRETE LOPEZ                      | HOSPITAL SAN JUAN DE ALICANTE            | ALICANTE                            |
| MARIA JOSE BURCHES FELICIANO             | ELCHE GENERAL UNIVERSITY HOSPITAL        | ELCHE (ALICANTE)                    |
| NEREA AGUIRRE MORENO                     | UNIVERSITY HOSPITAL REY JUAN CARLOS      | MÓSTOLES (MADRID)                   |
| LAURA MANJON MIGUELEZ                    | UNIVERSITY HOSPITAL CENTRAL DE ASTURIAS  | OVIEDO                              |
| ANA CHICO                                | HOSPITAL SANTA CREU I SANT PAU           | BARCELONA                           |
| CARLA MARISELA PACHECO URBINA            | HOSPITAL MONTECELO                       | PONTEVEDRA                          |
| FRANCISCO JOSE POMARES GOMEZ             | UNIVERSITY HOSPITAL SAN JUAN DE ALICANTE | SAN JUAN DE ALICANTE (ALICANTE)     |
| LUÍS CUIXART COSTA                       | HEALTH CENTER ROGER DE FLOR.             | BARCELONA                           |
| M <sup>a</sup> ZELL DEL CASTILLO NESWEDA | HEALTH CENTER ROGER DE FLOR              | BARCELONA                           |
| MARIA VICENTE SANTOS                     | HEALTH CENTER CAPUCHINOS                 | SALAMANCA                           |
| MONTSERRAT FREIXAS LAPORTA               | HEALTH CENTER ROGER FLOR                 | BARCELONA                           |
| NATALIA LOPEZ PAREJA                     | HEALTH CENTER CONGRES                    | BARCELONA                           |
| ROSARIO IGLESIAS GONZÁLEZ                | HEALTH CENTER PEDRO LAÍN ENTRALGO        | ALCORCÓN (MADRID)                   |
| ANA M <sup>a</sup> CEBRIÁN CUENCA        | HEALTH CENTER CARTAGENA CASCO            | CARTAGENA                           |
| MARIA TERESA MUR MARTÍ                   | HEALTH CENTER TERRASSA SUD               | TERRASSA (BARCELONA)                |
| VANESSA MARTÍNEZ AVILÉS                  | HEALTH CENTER RAVAL                      | ELCHE (ALICANTE)                    |
| SARA ARTOLA MENENDEZ                     | HEALTH CENTER JOSÉ MARVÁ                 | MADRID                              |
| ROSA MARIA MARTINEZ SAN CIPRIANO         | HEALTH CENTER PLAZA DEL EJERCITO         | VALLADOLID                          |
| MIREN ELIZARI RONCAL                     | HEALTH CENTER JOSÉ LUIS SANTAMARIA       | BURGOS                              |
| FERNANDO ALVAREZ GUIASOLA                | HEALTH CENTER RIBERA DEL ORBIGO          | BENAVIDES DE ORBIGO (LEON)          |
| CARLOS MIGUEL PETEIRO MIRANDA            | HOSPITAL DE VILADECANS                   | VILADECANS (BARCELONA)              |
| IGNACIO GARCIA HERRERO                   | HEALTH CENTER LOS BARREROS               | CARTAGENA                           |
| EVA PERELLÓ CAMACHO                      | UNIVERSITY HOSPITAL SAN JUAN DE ALICANTE | ALICANTE                            |
| MACARENA LOPEZ VÁZQUEZ                   | BELLVITGE UNIVERSITY HOSPITAL            | HOSPITALET DE LLOBREGAT (BARCELONA) |
| MARIA DELGADO SANDOVAL                   | UNIVERSITY HOSPITAL LA PAZ               | MADRID                              |
| DIANA ROMERO GODOY                       | HEALTH CENTER MÁS FONT                   | VILADECANS (BARCELONA)              |

#### INVESTIGATORS

AGUIRRE MORENO, NEREA; HOSPITAL UNIVERSITARIO REY JUAN CARLOS; MÓSTOLES (MADRID); ALVAREZ GUIASOLA, FERNANDO; C.S.RIBERA DEL ORBIGO; BENAVIDES DE ORBIGO (LEON); ARTOLA MENENDEZ, SARA; Health Center JOSÉ MARVÁ; MADRID; AVILA LACHICA, LUIS;

C.S. AXARQUIA OESTE; ALMACHAR; BENITO BADORREY, MARIA BELEN; C. S. EL RAVAL; BARCELONA; BERNABÉ CASANOVA, ANDREA; C. S. EL RAVAL; ELCHE (ALICANTE); BURCHES FELICIANO, MARIA JOSE; GENERAL UNIVERSITY HOSPITAL DE ELCHE; ELCHE (ALICANTE); BURGAÑA AGOÛES, ANDER; C. S. SANT CUGAT; SANT CUGAT DEL VALLÈS (BARCELONA); CALDERON GUADALUPE, JUAN MANUEL; C.S. VILLARRIN DE CAMPOS; VILLARRIN DE CAMPO (ZAMORA); CANDELA GARCÍA, IMACULADA; C. S. SANTA POLA; SANTA POLA (ALICANTE); CÁNOVAS GAILLEMIN, BÁRBARA; COMPLEJO HOSPITALARIO DE TOLEDO; TOLEDO; CARIDE MIANA, ELENA; C. S. LOS ÁNGELES; ALICANTE; CARRETERO ANIBARRO . ENRIQUE; C. S. HERRERA; HERRERA (SEVILLA); CEBRIÁN CUENCA, ANA M<sup>a</sup>; C. S. CARTAGENA CASCO; CARTAGENA; CHICO, ANA; HOSPITAL SANTA CREU I SANT PAU; BARCELONA; COSIALES, PILAR; C.S. AZPILAGAÑA; PAMPLONA; CUIXART COSTA, LUÍS; C. S. ROGER DE FLOR. ; BARCELONA; DEL CASTILLO NESWEDA, M<sup>a</sup> ZELL; C. S. ROGER DE FLOR.; BARCELONA; DELGADO SANDOVAL, MARIA; HOSPITAL UNIVERSITARIO LA PAZ; MADRID; DIEZ ESPINO, JAVIER; C. S. SALUD TAFALLA; TAFALLA (NAVARRA); ELIZARI RONCAL, MIREN; C.S.JOSÉ LUIS SANTAMARIA; BURGOS; FREIXAS LAPORTA, MONTSERRAT; C. S. ROGER FLOR; BARCELONA; GARCIA HERRERO, IGNACIO; C. S. LOS BARREROS; CARTAGENA; GUIJARRO DE ARMAS DE ARMAS, MARIA GUADALUPE; HOSPITAL UNIVERSITARIO DE GETAFE; GETAFE (MADRID); IGLESIAS GONZÁLEZ, ROSARIO; C. S. PEDRO LAÍN ENTRALGO; ALCORCÓN (MADRID); IGLESIAS GONZÁLEZ, ROSARIO; C. S. PEDRO LAÍN ENTRALGO; ALCORCÓN (MADRID); LOPEZ PAREJA, NATALIA; C. S. CONGRES; BARCELONA; LOPEZ VÁZQUEZ, MACARENA; HOSPITAL UNIVERSITARIO DE BELLVITGE; HOSPITALET DE LLOBREGAT (BARCELONA); MANJON MIGUELEZ, LAURA; HOSPITAL UNIVERSITARIO CENTRAL DE ASTURIAS; OVIEDO; MARCO ALACID, CRISTIAN; HOSPITAL VIRGEN DE LOS LIRIOS; ALCOY (ALICANTE); MARTIN GONZALEZ, ALBA; HOSPITAL 12 DE OCTUBRE; MADRID; MARTINEZ SAN CIPRIANO, ROSA MARIA; C.S. PLAZA DEL EJERCITO; VALLADOLID; MARTÍNEZ AVILÉS, VANESSA; C. S. EL RAVAL; ELCHE (ALICANTE); MATA CASES, MANEL; C. S. LA MINA; SANT ADRIÀ DE BESÒS (BARCELONA); MERINO TORRES, JUAN FRANCISCO; HOSPITAL UNIVERSITARIO LA FE; VALENCIA; MERINO VIVEROS, MARIA; HOSPITAL UNIVERSITARIO DE GETAFE; GETAFE (MADRID); MIRETE LOPEZ, ROSA M; HOSPITAL UNIVERSITARIO SAN JUAN DE ALICANTE; ALICANTE; MOLA REYES, LAURA; HOSPITAL CENTRAL DE LA DEFENSA GÓMEZ ULLA; MADRID; MUR MARTÍ, MARIA TERESA; C. S. TERRASSA SUD; TERRASSA (BARCELONA); NAVEA AGUILERA, CRISTINA; HOSPITAL UNIVERSITARIO DE GETAFE; GETAFE (MADRID); ORBEA GARCÍA, ROCÍO; C.S. CAMPOS LAMPREANA; VILLARRÍN DE CAMPOS (ZAMORA); ORTEGA RÍOS, FRANCISCO JAVIER; C.S. CAMPOS LAMPREANA; VILLARRÍN DE CAMPOS (ZAMORA); PACHECO URBINA, CARLA MARISELA; HOSPITAL MONTECELO; PONTEVEDRA; PARDO FRANCO, JOSE LUIS; C. S. ORIHUELA I; ORIHUELA (ALICANTE); PÁRRAGA, IGNACIO; C. S. ZONA VIII; ALBACETE; PERELLÓ CAMACHO, EVA; HOSPITAL UNIVERSITARIO SAN JUAN DE ALICANTE; ALICANTE; PERTUSA MARTINEZ, SALVADOR; C. S. CABO HUERTAS; ALICANTE; PETEIRO MIRANDA, CARLOS MIGUEL; HOSPITAL DE VILADECANS; VILADECANS (BARCELONA); POMARES GOMEZ, FRANCISCO JOSE; HOSPITAL UNIVERSITARIO SAN JUAN DE ALICANTE; SAN JUAN DE ALICANTE (ALICANTE); ROMERO GODOY, DIANA; C. S. MÁZ FONT; VILADECANS (BARCELONA); ROSET BARTROLI, MARTA; C. S. CONGRÉS; BARCELONA; SALVADOR MILIAN, M ANGELES; C. S. CONGRES; BARCELONA; SANTSALVADOR FONT, ISABEL; C. S. VALLDOREIX; SANT CUGAT DEL VALLÈS (BARCELONA); TERCERO MACIÁ, CRISTINA; GENERAL UNIVERSITY HOSPITAL DE ELCHE; ELCHE (ALICANTE); TORRES BAILE, JOSE LUIS; C. S. RODRIGUEZ PATERNA; LOGROÑO; VERDES SANZ, GUAYENTE; HOSPITAL COMARCAL DE ALCAÑIZ; ALCAÑIZ (TERUEL); VICENTE SANTOS, MARIA; C. S. CAPUCHINOS; SALAMANCA; VILASECA LLOBET, JOSEP MARIA; CAP COMTE BORRELL; BARCELONA; ZAMORA MESTRE, SILVIA; C. S. ROGER DE FLOR; BARCELONA; ZARZA MARTÍNEZ, SANDRA; C.S. LA PUEBLA DE ALMORADIEL; LA PUEBLA DE ALMORADIEL (TOLEDO); ZAZO MENARGUES, JUAN MANUEL; C. S. EL RAVAL; ELCHE (ALICANTE).
